# Supplementary material
Source: MDPI journal article supplement (https://www.mdpi.com/2304-6732/10/11/1275)
Supplement: s1 [file s1]

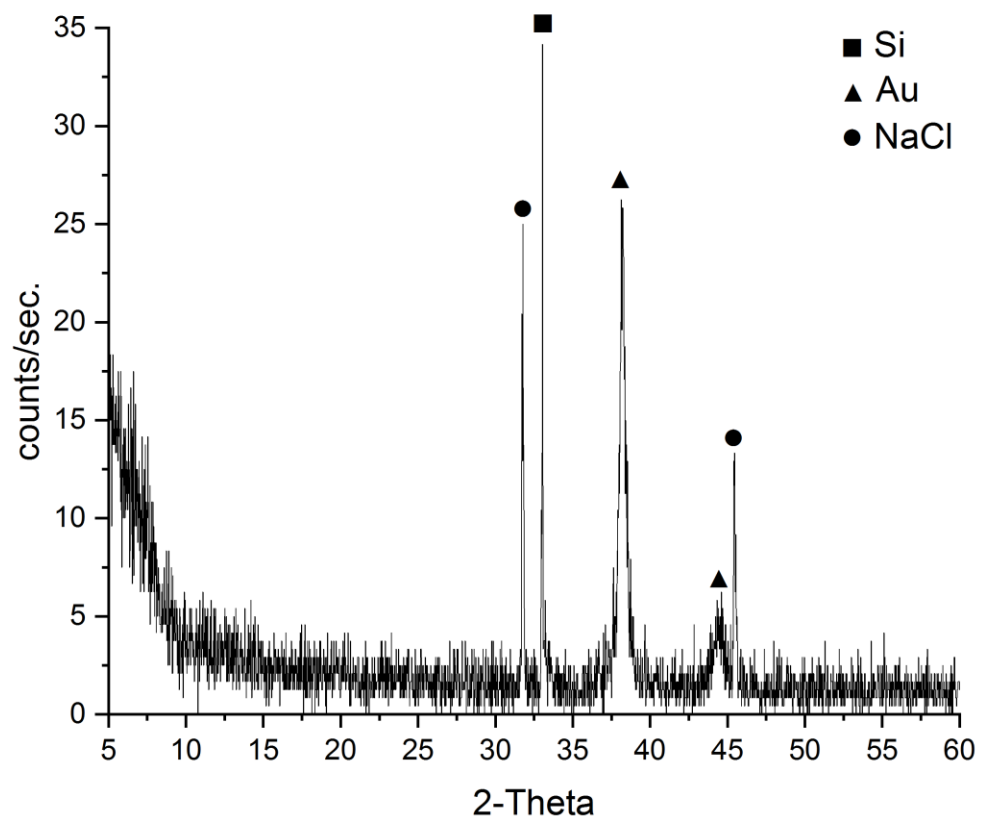

**Figure S1.** X-ray diffractogram of the Au nanoparticle sol prepared with the addition of four doses of Au precursor drop-dried on Si(100). The lines of Au, NaCl, and Si can be clearly identified.
